# Supplementary material for: Distribution, migration and potential risk of heavy metals in the Shima River catchment area, South China
Source: Royal Society of Chemistry journal article supplement (doi:10.1039/c5em00156k), 2015-01-01
Supplement: c5em00156k1.pdf [file c5em00156k1.pdf]

## Supplemental materials

**MANUSCRIPT TITLE:** Distribution, migration and potential risk of heavy metals in the Shima River catchment area, South China

**AUTHORS:** Lei Gao,<sup>a</sup> Jianyao Chen,<sup>\*b</sup> Changyuan Tang,<sup>a</sup> Zhiting Ke,<sup>b</sup> Jiang Wang,<sup>b</sup> Yuta Shimizu<sup>c</sup> and Aiping Zhu<sup>b</sup>

**ADDRESS:** <sup>a</sup> School of Environmental Science and Engineering, Sun Yat-Sen University, Guangzhou, 510275, China  
<sup>b</sup> School of Geography and Planning, Sun Yat-Sen University, Guangzhou, 510275, China  
<sup>c</sup> National Agricultural Research Center for Western Region, National Agriculture and Food Research Organization, Hiroshima 7218514, Japan

**TABLES:** 4

**NO. OF PAGES:** 3

Table S1 Indices and grades of potential ecological risk.

| $E_r^i$                | Grades of ecological risk for individual heavy metal | $RI$                | Grades of ecological risk |
|------------------------|------------------------------------------------------|---------------------|---------------------------|
| $E_r^i < 40$           | Low risk                                             | $RI < 150$          | Low risk                  |
| $40 \leq E_r^i < 80$   | Moderate risk                                        | $150 \leq RI < 300$ | Moderate risk             |
| $80 \leq E_r^i < 160$  | Considerable risk                                    | $300 \leq RI < 600$ | Considerable risk         |
| $160 \leq E_r^i < 320$ | High risk                                            | $RI \geq 600$       | High risk                 |
| $E_r^i \geq 320$       | Very high risk                                       |                     |                           |

Table S2 Range and average of physicochemical properties of soil samples

| Sampling site | pH                | EC<br>ms·m <sup>-1</sup> | Clay<br>%         | Silt<br>%          | Sand<br>%          | <63μm<br>%         | SOM<br>%            | Total P<br>%         |
|---------------|-------------------|--------------------------|-------------------|--------------------|--------------------|--------------------|---------------------|----------------------|
| S1(n=5)       | 6.84<br>6.43–7.22 | 17.9<br>11.9–27.5        | 1.24<br>0–4.79    | 29.6<br>9.26–39.6  | 46.3<br>32.7–79.1  | 58.0a<br>22.5–73.1 | 1.24AB<br>0.57–1.83 | 1.08ABC<br>0.33–1.78 |
| S2(n=6)       | 7.01<br>6.87–7.41 | 22.3a<br>16.4–32.9       | 1.05<br>0–3.49    | 30.4<br>15.9–38.0  | 41.4<br>27.2–65.8  | 60.8a<br>32.7–75.3 | 0.35A<br>0.10–1.30  | 0.60A<br>0.30–1.20   |
| S3(n=4)       | 6.39<br>6.14–6.85 | 107<br>60.0–131          | 2.95<br>2.60–3.49 | 35.4<br>28.8–38.7  | 25.7<br>21.5–36.13 | 75.7a<br>64.8–80.0 | 3.94D<br>3.38–4.34  | 2.32C<br>1.23–3.85   |
| S4(n=5)       | 6.96<br>6.64–7.26 | 34.0<br>19.9–46.2        | 1.72<br>0–3.40    | 25.1<br>12.7–31.7  | 50.3<br>32.9–79.6  | 52.0a<br>23.0–68.8 | 2.69C<br>1.95–3.07  | 1.96BC<br>1.63–2.63  |
| S5(n=5)       | 7.02<br>6.48–7.32 | 61.3b<br>20.5–102        | 3.01<br>1.71–3.97 | 33.7<br>21.1–41.4  | 31.0<br>11.1–64.0  | 69.8a<br>40.0–88.2 | 1.88BC<br>0.95–2.61 | 1.40ABC<br>0.30–2.80 |
| S6(n=5)       | 6.35<br>5.82–6.80 | 20.3a<br>19.0–24.6       | 3.60<br>2.25–4.84 | 29.3<br>20.4–37.4  | 37.8<br>15.7–60.7  | 63.2a<br>41.9–84.0 | 1.77BC<br>1.49–2.41 | 1.90BC<br>1.00–2.30  |
| S7(n=4)       | 6.86<br>6.31–7.46 | 10.4<br>4.98–18.0        | 2.76<br>0.28–4.12 | 37.32<br>32.2–41.7 | 26.8<br>19.6–34.1  | 75.1a<br>66.4–80.5 | 1.02AB<br>0.24–2.48 | 0.68ABC<br>0.25–1.71 |
| S8(n=5)       | 6.59<br>6.29–7.20 | 9.14<br>5.52–12.9        | 2.96<br>0–8.09    | 3514<br>21.6–52.3  | 31.8<br>15.5–52.2  | 71.2a<br>45.6–90.8 | 0.86AB<br>0.43–1.96 | 0.59A<br>0.19–1.35   |

Data expression: mean (minimum–maximum);  
ab exhibited significant differences at  $p < 0.05$ ;  
ABCD exhibited significant differences at  $p < 0.01$ .

Table S3 EC<sub>20</sub> (%) of R1, R3, R4 and R5 for 15 and 30 min exposure in February

| Sample site | Dilution series (%) | 15 min PE<br>(%)        | EC <sub>20</sub> (%)<br>(95 % confidence interval) | 30min PE<br>(%)        | EC <sub>20</sub> (%)<br>(95 % confidence interval) |
|-------------|---------------------|-------------------------|----------------------------------------------------|------------------------|----------------------------------------------------|
| R1          | 25                  | 9.07±2.10 <sup>a</sup>  | 61.3<br>(53.4–70.6)                                | 10.4±3.82 <sup>a</sup> | 54.9<br>(47.5–63.2)                                |
|             | 50                  | 12.2±1.75 <sup>ab</sup> |                                                    | 16.3±2.20 <sup>b</sup> |                                                    |
|             | 100                 | 31.1±1.02 <sup>c</sup>  |                                                    | 32.8±2.78 <sup>c</sup> |                                                    |
| R3          | 25                  | 9.85±1.08 <sup>a</sup>  | 62.3<br>(52.6–75.5)                                | 13.3±2.25 <sup>a</sup> | 51.1<br>(40.5–63.1)                                |
|             | 50                  | 16.7±2.49 <sup>b</sup>  |                                                    | 19.2±2.80 <sup>b</sup> |                                                    |
|             | 100                 | 27.5±4.79 <sup>c</sup>  |                                                    | 28.6±3.05 <sup>c</sup> |                                                    |
| R4          | 25                  | 5.23±2.92 <sup>a</sup>  | 65.4<br>(58.9–73.1)                                | 9.50±2.55 <sup>a</sup> | 46.0<br>(37.6–54.0)                                |
|             | 50                  | 13.6±1.95 <sup>b</sup>  |                                                    | 22.6±3.03 <sup>b</sup> |                                                    |
|             | 100                 | 31.8±1.53 <sup>c</sup>  |                                                    | 39.1±3.32 <sup>c</sup> |                                                    |
| R5          | 25                  | 8.70±0.88 <sup>a</sup>  | 58.7<br>(51.1–67.6)                                | 9.72±0.49 <sup>a</sup> | 54.2<br>(47.2–61.9)                                |
|             | 50                  | 16.8±2.87 <sup>b</sup>  |                                                    | 18.3±2.36 <sup>b</sup> |                                                    |
|             | 100                 | 30.8±3.50 <sup>c</sup>  |                                                    | 32.7±2.95 <sup>c</sup> |                                                    |

abc exhibited significant differences at  $p < 0.05$

As displayed in Table S3, the luminescent inhibition rate (LIR) of sample S1, S3, S4 and S5 decreased with decreasing concentration of water samples. Dilution obviously reduced the water sample toxicity effect on *Vibrio fischeri*. The effective concentration (%) of water samples causing 20 % reduction in LIR (EC<sub>20</sub>) of all water samples were decreased from 15 min to 30 min exposure time. Consistent with the toxic mechanism of heavy metals study on *Vibrio fischeri*, as reported by Petala *et al.* (2005), the toxicity of Hg, Cu, Cd, Ni and Cr increased significantly with extended exposure time. Content of Zn and Cu in samples, additionally indicated that toxic effect on *Vibrio fischeri* significantly increased, up to one order of magnitude, by increasing contact time from 5 to 25 min. The EC<sub>20</sub> or EC<sub>50</sub> of heavy metals thus decreased during the exposure period. EC<sub>20</sub> of water samples presented in the present study continued decreasing from 15 to 30 min which was corresponded with the effect of heavy metals.

Table S4 Statistical results of potential ecological risks of all heavy metals

| Heavy metal | Mean | Standard deviation | Range of potential ecological risk ( $E_i^p$ ) | Grade of potential ecological risk |
|-------------|------|--------------------|------------------------------------------------|------------------------------------|
| As          | 6.24 | 2.45               | 1.85–14.1                                      | Low                                |
| Cd          | 1860 | 529                | 894–3550                                       | Very high                          |
| Cr          | 2.16 | 1.07               | 0.72–5.84                                      | Low                                |
| Cu          | 26.5 | 21.4               | 2.75–84.5                                      | Low – considerable                 |
| Ni          | 10.6 | 5.18               | 3.20–28.6                                      | Low                                |
| Pb          | 5.50 | 3.51               | 0.43–13.4                                      | Low                                |
| Zn          | 4.28 | 2.66               | 0.81–9.34                                      | Low                                |

### Reference:

M. Petala, V. Tsiridis, S. Kyriazis, P. Samaras, A. Kungolos and G. P. Sakellariopoulos, *Proceedings of the 9th International Conference on Environmental Science and Technology*, 2005, 1200-1205.
